# Supplementary material for: A Ribonucleoprotein Complex Protects the Interleukin-6 mRNA from Degradation by Distinct Herpesviral Endonucleases
Source: PubMed Central journal article supplement (PMC4428876; doi:10.1371/journal.ppat.1004899), 2015-05-12
Supplement: ppat.1004899.s005.pdf [file ppat.1004899.s005.pdf]

293T

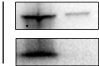

Nuclear Fraction  
Cytoplasmic Fraction

NCL

H3
