# Supplementary material for: A Ribonucleoprotein Complex Protects the Interleukin-6 mRNA from Degradation by Distinct Herpesviral Endonucleases
Source: PubMed Central journal article supplement (PMC4428876; doi:10.1371/journal.ppat.1004899), 2015-05-12

Relative GFP mRNA levels

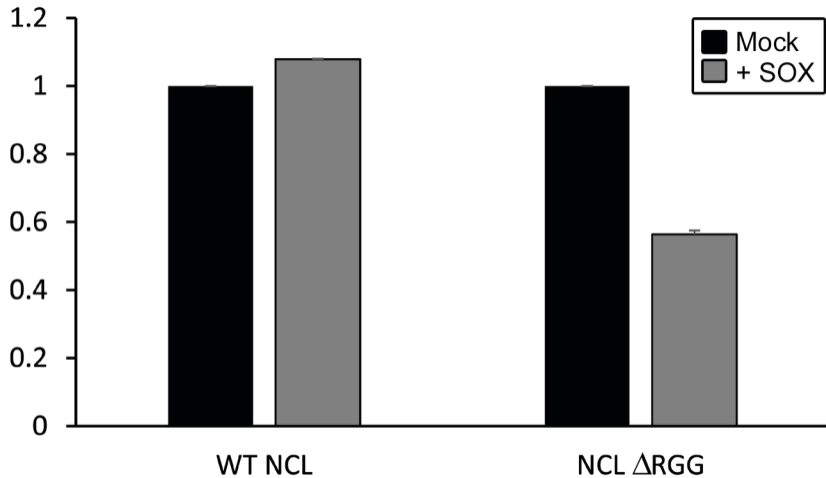

$\alpha$ -Flag

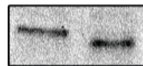

$\alpha$ -Xrn1

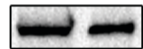

Supplement: ppat.1004899.s007.pdf [file ppat.1004899.s007.pdf]
