# Supplementary material for: A Ribonucleoprotein Complex Protects the Interleukin-6 mRNA from Degradation by Distinct Herpesviral Endonucleases
Source: PubMed Central journal article supplement (PMC4428876; doi:10.1371/journal.ppat.1004899), 2015-05-12
Supplement: ppat.1004899.s009.pdf [file ppat.1004899.s009.pdf]

control siRNA

eIF4H siRNA

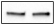

Xmi1

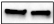

NCL

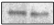

SOX

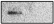

eIF4H
