# Supplementary material for: A Ribonucleoprotein Complex Protects the Interleukin-6 mRNA from Degradation by Distinct Herpesviral Endonucleases
Source: PLoS Pathog. 2015 May 12;11(5):e1004899. doi: 10.1371/journal.ppat.1004899 (PMC4428876; doi:10.1371/journal.ppat.1004899)
Supplement: S4 Table — (XLSX) [file ppat.1004899.s015.xlsx]

## Sheet: Sheet1
Name	Sequence (5'-3' orientation)
Csy4_SRE Forward	GCTTGGTACCGTTCACTGCCGTATAGGCAGCTAAGAAAGAATTCCATGGGCACCTCAGATTGTTGTTG
Csy4_SRE Reverse	CTAGACTCGAGCTTAAAAATATAAATATGACTTACATAAATTAACTC
Csy4_251-450 Forward	GCTTGGTACCGTTCACTGCCGTATAGGCAGCTAAGAAAAGAAAGGAGACATGTAACAAGAG
Csy4_251-450 Reverse	TAGACTCGAGTCAAATCTGTTCTGGAGGTACTC
IL-6 ΔSRE PCR1 Forward	CAAGAAGCTTAGCCATGGCTTCCCGCCGGAGGTGG
IL-6 ΔSRE PCR1 Reverse	TTTCAAGTGGTACTTCTACACATTGATCCTAGCAGAAGC
IL-6 ΔSRE PCR2 Forward	AGGATCAATGTGTAGAAGTACCACTTGAAACATTTTATGTATTAG
IL-6 ΔSRE PCR2 Reverse	CTGATCAGCGGGTTTAAACGGGCCCTCTAGACTCGA
NCL Forward	GGGGACAACTTTGTACAAAAAAGTTGGCATGGTGAAGCTCGCGAAGG
NCL Reverse	GGGGACAACTTTGTACAAGAAAGTTGGGTACTATTCAAACTTCGTCTTCTTTCCTTG
NCL DRGG Reverse	GGGGACAACTTTGTACAAGAAAGTTGGGTACTACTTAGGTTTGGCCCAGTCCAAG
NCL DNLS	TGTCAAAGAAGCACCTGGAGAAATGGCCAAACAGAAAG
NCL RBD1	TGTCAGAATTGGTATGACTAGGAAAGATGGTGATGTGGATTTTGAATCTGCTGAAG
NCL RBD2	AGCAAGGATGGGAAAAGTAAAGGGGATGCTGATATTGAATTTAAGACAGAAGCTG
